# Supplementary material for: Transcriptional Network Analysis Reveals that AT1 and AT2 Angiotensin II Receptors Are Both Involved in the Regulation of Genes Essential for Glioma Progression
Source: PubMed Central journal article supplement (PMC4217762; doi:10.1371/journal.pone.0110934), 2014-11-03
Supplement: pone.0110934.s001.pdf [file pone.0110934.s001.pdf]

**Table S1. KEGG categories and respective enriched genes regulated by Ang II at 3 hours interval**

| KEGG category                               | Up-regulated Genes                                                                           |
|---------------------------------------------|----------------------------------------------------------------------------------------------|
| MAPK signaling pathway                      | Mapk1, Cdc25b, Akt1, Kras, Map2k4, Mapkapk2, Mecom, Map2k5, Ppp3r1, Elk1, Rras, Ppp5c, Gna12 |
| Chemokine signaling pathway                 | Shc3, Mapk1, Akt1, Kras, Cxcl10, Cxcl12, Gnai3, Prex1, Gnb2                                  |
| Regulation of actin cytoskeleton            | Mapk1, Apc, Kras, Myl9, Rras, Fgd1, Pdgfc, Gna12, Git1                                       |
| Tight junction                              | Akt1, Kras, Magi3, Gnai3, Myl9, Inadl, Rras, Pard6b, Lgl1                                    |
| ErbB signaling pathway                      | Shc3, Mapk1, Akt1, Kras, Map2k4, Elk1, Nck2                                                  |
| Neurotrophin signaling pathway              | Shc3, Mapk1, Akt1, Kras, Mapkapk2, Map2k5, Sh2b1                                             |
| Ubiquitin mediated proteolysis              | Keap1, Ube2e3, Pias1, Mgrn1, Kihl13, Anapc10, LOC68922                                       |
| Insulin signaling pathway                   | Shc3, Mapk1, Akt1, Kras, Elk1, Rhoq                                                          |
| Chronic myeloid leukemia                    | Shc3, Mapk1, Akt1, Kras, Mecom, E2f1                                                         |
| Cell cycle                                  | Cdc25b, Mcm5, Mcm6, Tfdp2, Anapc10, E2f1                                                     |
| Glioma                                      | Shc3, Mapk1, Akt1, Kras, E2f1                                                                |
| VEGF signaling pathway                      | Mapk1, Akt1, Kras, Mapkapk2, Ppp3r1                                                          |
| Gap junction                                | Mapk1, Kras, Gnai3, Map2k5, Pdgfc                                                            |
| KEGG category                               | Down-regulated Genes                                                                         |
| Protein processing in endoplasmic reticulum | Stub1, Ganab, Bag1, Tram1, Ckap4, Man1b1, Wfs1                                               |
| Axon guidance                               | Sema3c, Nfat5, Efn4, Ephb6, Unc5a, Slit1                                                     |
| ECM-receptor interaction                    | Lama5, Cd47, Col1a1, Col5a3                                                                  |
| TGF-beta signaling pathway                  | Ep300, Gdf7, Ltbp1, Tgfb2                                                                    |
| PPAR signaling pathway                      | Dbi, Slc27a4, Scd4, Slc27a1                                                                  |
| mTOR signaling pathway                      | Rps6ka2, Ins1, Tsc2                                                                          |
| Notch signaling pathway                     | Ep300, Ncstn, Psen2                                                                          |
| Aldosterone-regulated sodium reabsorption   | Ins1, Prkca, Scnn1a                                                                          |
| N-Glycan biosynthesis                       | Ganab, Alg11, Man1b1                                                                         |

**Table S2. Biological processes (GO) and respective enriched genes regulated by Ang II at 3 hours interval**

| Biological Process                                   | Up-regulated Genes                                                                                                 |
|------------------------------------------------------|--------------------------------------------------------------------------------------------------------------------|
| cell cycle                                           | Apc, Ccng1, Nucks1, Rab11b, Sept9, Rgs2, Mapk1, Cdc25b, Cgref1, Mecom, Thap1, Specc1l, Ankrd54, Lzts, E2f1, Pcd6ip |
| cell division                                        | Cdc25b, Ccng1, Gnai3, Specc1l, LZts2, Pcd6ip, Sept9                                                                |
| cell growth                                          | Akt1, Cxcl12, Map2k5, Taf9                                                                                         |
| protein transport                                    | Nutf2, Sec13, Atp6v1e1, Ipo9, Chchd4, Pex5, Chmp1a, Pcd6ip, Exoc5, Ykt6, Atp6v1a, Rab11b                           |
| intracellular signal transduction                    | Shc3, Mapk1, Akt1, Def8, Dnmbp, PRerx1, Blnk, Grb15, Sh2b1                                                         |
| small GTPase mediated signal transduction            | Mapk1, Kras, Rnd2, Rras, Arl6, Rab11b, Rhoq, Gnai3, Gfm2, Gna12                                                    |
| protein folding                                      | Fkbp4, Ranbp2, Ppil4, Dnajc11, Ptges3, Grpel1, St13                                                                |
| protein ubiquitination / polyubiquitination          | Akt1, Mgrn1, Klhl13, Rnf187, Zfp364, March2, Ube2e3, Ube2v1, Mgrn1, Rnf187, LOC689226                              |
| actin cytoskeleton organization                      | Kras, Fhl3, Fgd1, Llg1, Cap1, Rhoq                                                                                 |
| MyD88-dependent toll-like receptor signaling pathway | Mapk1, Map2k4, Mapkapk2, Ube2v1, Elk1                                                                              |
| Wnt receptor signaling pathway                       | Wif1, Apc, Ldb1, Lzts2                                                                                             |
| response to DNA damage stimulus                      | Mapk1, Apc, Apbb1, Paxip1, Obfc2b                                                                                  |
| response to ionizing radiation                       | Cxcl10, Vcam1, Paxip1, Obfc2b                                                                                      |
| Biological Process                                   | Down- regulated Genes                                                                                              |
| ion transport                                        | Steap3, Tmem37, Scnn1a, Kcnh3, Kcnk3, Gabrd, Slc22a18, Cacna1i, Slc22a23, Slc12a6                                  |
| brain development                                    | Ptprg, Dbi, Cdk5rap1, Nkx2-1, Cdk5rap2, Kcnk3, Bcr, Slc7a11, Slit1, Hrh3                                           |
| protein transport                                    | Steap3, Aagab, Dnm2, Mcoln1, Cox18, Apoc2, Col1a1, Lca5, Tram1, Psen                                               |
| heart development                                    | Rps6ka2, Sox9, Ep300, Gja1, Tsc2, Oxt, Sema3c, Sox18, Tgfb2                                                        |
| negative regulation of cell proliferation            | Sox9, Gja1, Grm4, Igfbp3, Prkca, Tsc2, Serpine2, S2f7, Tgfbp2                                                      |
| negative regulation of apoptosis                     | Sox9, Grm4, Bag1, Cln8, Tex11, Psen2, Tgfb2, Wfs1                                                                  |
| response to hypoxia                                  | Ep300, Pnmt, Tsc2, Kcnk3, Agtrap, Adsl, Psen2, Tgfbp2                                                              |
| axon guidance                                        | Gdf7, Nkx2-1, Neurog2, Unc5a, Slit1, Tgfb2                                                                         |
| protein folding                                      | Ganab, Bag1, RGD1565752, Dnajc17, Fxpb10, Man1b1                                                                   |
| negative regulation of cell growth                   | Dnajc2, Serpine2, Ndufa13, Slit1, Tgfb2                                                                            |
| cell migration                                       | Lama5, Cd47, Lamb1, Mdk, Tgfb2                                                                                     |

**Table S3. KEGG categories and respective enriched genes regulated by Ang II at 6 hours interval**

| KEGG category                                      | Up-regulated Genes                                                                                                                      |
|----------------------------------------------------|-----------------------------------------------------------------------------------------------------------------------------------------|
| <b>Cell cycle</b>                                  | Chek2, Ccna2, Bub1b, Ccnb1, Ywhaq, Skp2, Smc3, Mcm4, Hdac1, Anapc1, Stag2, Cdc7, MGC112830, Anapc10, Cdk2, Cdc26, Cdkn2c, Cdkn2d, Cdc20 |
| <b>Pathways in cancer</b>                          | Mapk1, Smo, Ctbp1, Skp2, Hdac1, Pias1, Stk36, Col4a2, Cdk2, Tcf7, Mapk9, Ccdc6, Grb2, Mlh2, Sos2                                        |
| <b>RNA transport</b>                               | Nup107, Eif4e, Eif4a1, Thoc3, Ncbp1, Pabpc4, Sumo1, RGD1306195, Nup205, Eif4e2, Gemin7, Sumo2, Thoc4                                    |
| <b>MAPK signaling pathway</b>                      | Mapk1, Mapk4k3, Hspa8, Hspa1l, Ntf4, Map2k4, Pak2, Elk1, Mapk9, Chp, Grb2, Sos2                                                         |
| <b>Focal adhesion</b>                              | Mapk1, Capn2, Pak2, Vcl, Col4a2, Elk1, Vasp, Itga8, Mapk9, Grb2, Sos2                                                                   |
| <b>Insulin signaling pathway</b>                   | Mapk1, Eif4e, Elk1, Eif4e2, Prkag2, Mapk9, Calm2, Grb2, Sos2                                                                            |
| <b>Protein processing in endoplasmic reticulum</b> | Nploc4, Hspa8, Hspa1l, Hsph1, Capn2, Man1a2, Ube2j2, Mapk9, Eif2ak2                                                                     |
| <b>Spliceosome</b>                                 | Hspa8, Hspa1l, Thoc3, Snrpd1, Ncbp1, lsm6, Pcbp1, Plrg1, Thoc4                                                                          |
| <b>Ubiquitin mediated proteolysis</b>              | Skp2, Ube2q1, Ube2j2, Pias1, Anapc1, Anapc10, Ube2l3, Cdc26, Cdc20                                                                      |
| <b>Proteasome</b>                                  | Psme3, Pomp, Psma1, Psmd14                                                                                                              |
| <b>ErbB signaling pathway</b>                      | Mapk1, Map2k4, Pak2, Abl2, Elk1, Mapk9, Grb2, Sos2                                                                                      |
| <b>Neurotrophin signaling pathway</b>              | Mapk1, Ywhaq, Ntf4, Nfkbie, Mapk9, Calm2, Grb2, Sos2                                                                                    |
| <b>p53 signaling pathway</b>                       | Chek2, Ccnb1, Ei24, Cdk2, Zmat3                                                                                                         |
| <b>Adherens junction</b>                           | Mapk1, Yes1, Vcl, Ctnnd1, Tcf7                                                                                                          |
| <b>Chronic myeloid leukemia</b>                    | Mapk1, Ctbp1, Hdac1, Grb2, Sos2                                                                                                         |
| KEGG category                                      | Down-regulated Genes                                                                                                                    |
| <b>Parkinson's disease</b>                         | Cox6a2, Cyc2, Ndufs2, Ube2g2, Ube2l6, Ndufa12, Ndufa6, Ndufv3, Ndufa3                                                                   |
| <b>Mineral absorption</b>                          | Slc31a1, Slc39a3, Slc26a6, Hmox2                                                                                                        |
| <b>Cytosolic DNA-sensing pathway</b>               | Ripk3, Ifna4, RGD1562552, Polr3g                                                                                                        |
| <b>Pantothenate and CoA biosynthesis</b>           | Coasy, Ppcs, Enpp3                                                                                                                      |
| <b>Protein export</b>                              | Srp19, Srpr, Sec61g                                                                                                                     |
| <b>Riboflavin metabolism</b>                       | Acp5, Enpp3                                                                                                                             |

**Table S4. Biological processes (GO) and respective enriched genes regulated by Ang II at 6 hours interval**

| <b>Biological Process</b>                                        | <b>Up-regulated Genes</b>                                                                                                                                                                 |
|------------------------------------------------------------------|-------------------------------------------------------------------------------------------------------------------------------------------------------------------------------------------|
| <b>protein phosphorylation</b>                                   | Chek2, Nek2, Wnk1, Mapk1, Cdk5, Map4k3, Camk1, Cdk12, YEs1, Ccnb1, Dyrk1a, Map2k4, Pak2, Sgk1, Tbk1, Lrrk2, Stk36, Abl2, Pxx, Mst4, Nek6, Spag9, Cdc7, Vrk1, Cdk2, Pik3r4, Mapk9, Eif2ak2 |
| <b>negative regulation of apoptosis</b>                          | Dffa, Il6r, Serbp1, Glp1r, Smo, Fnta, Accn1, Fignl1, Gata6, Hells, Htt, Skp2, Sgk1, Hdac1, Apbb2, Serpinb9, Pea15a, Taf9, Rtn4, Twist1                                                    |
| <b>positive regulation of apoptosis</b>                          | Dffa, Cdk5, Aldh1a3, Map2k4, Gata6, Skp2, Ing4, Sav1, Apbb2, RGD1309922, Top2a, Mapk9, Eif2ak2                                                                                            |
| <b>proteasomal ubiquitin-dependent protein catabolic process</b> | Bub1b, Ccnb1, Psme3, Ube2v2, Psmd5, Psma1, Lrrk2, Sumo1, Fbxl5, Psmd14, Anapc1, Anapc10, Trim13, Cdc26, Taf9, Cdc20, Ppp2r5c, Gipc1                                                       |
| <b>negative regulation of cell proliferation</b>                 | Phb2, Cd9, Igfbp5, Tinf2, Ing4, Hdc1, Sav1, Lrrk2, Brip1, Cdkn2c, Eif2ak2, Dlc1, Slc9a3r1, Mfn2, Inpp1, Ppp2r5c                                                                           |
| <b>cell cycle</b>                                                | Ccna2, Clasp2, Mapk1, Cdk5, Kif2c, Smc3, Arhgef2, Nek6, Spast, Cdk2, Cdc26, Calm2, Cdc20, Mlh1                                                                                            |
| <b>cell division</b>                                             | Ccna2, Clasp2, Cdk5, Kif2c, Ccnb1, Smc3, Arhgef2, nek6, Top2a, Spast, Cdk2, Cdc26, Cdc20, Top1                                                                                            |
| <b>nervous system development</b>                                | Myo1b, Camk1, Dyrk1a, Accn1, Ube2v2, Dpf3, Lrrk2, Ophn1, Spast, Kctd11, LOC606294, Rtn4, Nrn1, Ppp1r9b                                                                                    |
| <b>DNA repair</b>                                                | Polk, Wrnip1, Ube2v2, Polq, Fbxo18, Rbbp8, Fto, Smc3, Pole, Rev3l, Recql, Rnf168, Mlh1, Parg                                                                                              |
| <b>actin cytoskeleton organization</b>                           | Cdk5, Mk1, Sipa1l1, Coro1b, Capzb, Abl2, Ophn1, Ehd2, Vasp, Dlc1, Slc9a3r1, Cap1, Capza1                                                                                                  |
| <b>DNA replication</b>                                           | Wrnip1, Map2k4, Polq, Mcm4, Ing4, Pole, Rev3l, Recql, Cdc7, Cdk2, Helb, Top1                                                                                                              |
| <b>protein ubiquitination</b>                                    | Rnf34, Skp2, Rnf2, Fbxl5, Anapc1, Anapc10, Rfws3, Ube2l3, Trim13, Cdc26, Rnf168, Ccnb1, Psme3, Psmd5, Psma1, Lrrk2, Psmd14, Tbc1d7, Cdc20                                                 |
| <b>mitosis</b>                                                   | Clasp2, Kif2c, Ccnb1, Jtb, Smc3, Arhgef2, Nek6, Cdk2, Cdc26, Cdc20                                                                                                                        |
| <b>RNA splicing</b>                                              | Cdk13, Snrpd1, Cd2bp2, Ncbp1, Hnrnpa2b1, Srek1, Plrg1, Thoc4, Polr2f                                                                                                                      |

| Biological Process                            | Down- regulated Genes                                                                                                                                        |
|-----------------------------------------------|--------------------------------------------------------------------------------------------------------------------------------------------------------------|
| apoptosis                                     | Psmc9, Acsbg1, Ripk3, Prkcb, Cycc, Aqp2, Ncstn, Psmg2, Actc1, Fastk, Arhgef4, Ciapin1, Plekhf1, Trim39, Traf2, Aen, Itgb3bp, Scrip, Pdcd2, Dapk3, Aifm1, Plg |
| protein transport                             | Pgap2, Arfgap1, Abra, Vps36, Snx17, Rabif, Chmp2b, Chmp7, Efcab4b, Arfgap3, Gorasp1, Vps33b, Pex14, Snap23, Scamp2, Vps25, LOC681989, Fxc1, Rab27b, Sec31a   |
| intracellular protein transport               | Vamp1, Abra, Ipo4, Napg, Ipo7, Srpr, Snupn, Tom1l2, Tom1, Sar1a, Xpo5, Scamp2, LOC683402                                                                     |
| protein ubiquitination                        | Zfp91, Ube2g2, Rnf146, Uhrf2, Traf2, Tri32, Khlh21, Cbl1, Mdm2, Ube3a, Herc6, Anapc13                                                                        |
| ubiquitin-dependent protein catabolic process | Usp2, Usp4, Usp15, Rnf146, Uhrf2, Trim32, Mdm2, Ube3a, Herc6, Usp48                                                                                          |
| response to oxidative stress                  | Abcc1, Coq7, Cycc, Ndufs2, Ndufa12, Ppp1r15b, Lias, Ndufa6, Hmox2                                                                                            |
| vesicle-mediated transport                    | Arfgap1, Vamp1, Sar1a, Vamp4, Arfgap3, Vps33b, Snap23, LOC683402, Sec31a                                                                                     |
| protein targeting                             | Optn, Srp19, Strada, Mdm2, Srpr, Xpo5, Pmpcb, Pex14, Fxc1                                                                                                    |
| positive regulation of cell migration         | Abcc1, Acp5, Trim32, Cbl1, Srp2, Cxcl16, Ager, Vegfa                                                                                                         |
| cytoskeleton organization                     | Cdc42bpa, Uxt, Bbs4, Tekt4, Tubgcp2, MAST1, Ablim2, Trpv4, Rhoq                                                                                              |

**Table S5. KEGG categories and respective enriched genes regulated by Ang II via AT1 receptor at 3 hours interval**

| KEGG category                               | Up-regulated Genes                                                               |
|---------------------------------------------|----------------------------------------------------------------------------------|
| Metabolic pathways                          | Ndst2, Hsd17b1, B3gnt1, Polrf3f, Etnk1, Rdh12, Chpf, Pigu, Alg11, Alg9, Rfk, Rpe |
| Lysosome                                    | Mcoln1, Aga, Abca2                                                               |
| Acute myeloid leukemia                      | Myc, Rps6kb2                                                                     |
| Steroid hormone biosynthesis                | Sts, Hsd17b1                                                                     |
| N-Glycan biosynthesis                       | Alg11, Alg9                                                                      |
| KEGG category                               | Down-regulated Genes                                                             |
| Cell cycle                                  | Chek2, Cdc25b, Rp53, Anapc5, Mcm5, Smc1a                                         |
| p53 signaling pathway                       | Chek2, Tp53, Tsc2                                                                |
| Amino sugar and nucleotide sugar metabolism | Gale, Amdhd2, Gmppa                                                              |
| beta-Alanine metabolism                     | Acadm, Aldh2                                                                     |
| Propanoate metabolism                       | Acadm, Aldh2                                                                     |
| Glycine, serine and threonine metabolism    | Shmt2, Gcat                                                                      |
| Vasopressin-regulated water reabsorption    | Dctn6, Dynll1                                                                    |
| DNA replication                             | Mcm5, Pola1                                                                      |

**Table S6. Biological processes (GO) and respective enriched genes regulated by Ang II via AT1 receptor at 3 hours interval**

| <b>Biological Process (GO)</b>                                                                 | <b>Up-regulated Genes</b>                                                 |
|------------------------------------------------------------------------------------------------|---------------------------------------------------------------------------|
| protein transport                                                                              | Lman1, Unc50, Mcoln1, Tram1, Atg9a                                        |
| positive regulation of apoptosis                                                               | Jak2, Myc, Tlr4, Stk4                                                     |
| steroid metabolic process                                                                      | Lcat, Sts, Hsd17b1, Scap                                                  |
| inflammatory response                                                                          | Tnfrsf1b, Tnfrsf4, Tlr4, Jak, Ccl24, Zyx, Cd276                           |
| tumor necrosis factor-mediated signaling pathway                                               | Tnfrsf1b, Jak2, Tnfrsf4                                                   |
| positive regulation of cell migration                                                          | Jak2, Ccl24, Lamb1                                                        |
| intracellular protein kinase cascade                                                           | Jak2, Stk4                                                                |
| <b>Biological Process (GO)</b>                                                                 | <b>Down-regulated Genes</b>                                               |
| cell cycle / division and mitosis                                                              | Cdc25b, Avpi1, Ppp1c, Anapc5, Kifc1, Mtus1, RGD1306730, Smc1a, Arl2, Mlh1 |
| regulation of cell cycle                                                                       | Cdc37, Tp53, Tsc2, Bop1                                                   |
| DNA repair                                                                                     | Fbxo18, Kctd13, Smc1a, Mlh1, Pola1                                        |
| carbohydrate metabolic process                                                                 | Gale, Ppp1c, Amdhd2, Chst5                                                |
| protein homooligomerization                                                                    | Acadm, Tsc2, Kctd13, Shmt2                                                |
| cell migration                                                                                 | Bcar1, Kctd13, Gsk3a, Bambi                                               |
| negative regulation of signal transduction                                                     | Tsc2, Erbb3, Gsk3a, Rfng                                                  |
| DNA damage response, signal transduction resulting in induction of apoptosis                   | Chek2, Tp53, Mlh1                                                         |
| circadian rhythm                                                                               | Nfil3, Erbb3, Arntl                                                       |
| insulin receptor signaling pathway                                                             | Eif4ebp1, Bcar1, Gsk3a                                                    |
| anaphase-promoting complex-dependent proteasomal ubiquitin-dependent protein catabolic process | Psmc9, Psme3, Anapc5                                                      |
| neuroblast proliferation                                                                       | Tp53, Racgap1, Sox2                                                       |
| TOR signaling cascade                                                                          | Eif4ebp1, Tsc2                                                            |
| positive regulation of epithelial to mesenchymal transition                                    | Wwtr1, Bambi                                                              |
| cytokinesis                                                                                    | Incenp, Racgap1                                                           |
| Rho protein signal transduction                                                                | Kctd13, Cdc42ep1                                                          |
| negative regulation of Wnt receptor signaling pathway                                          | Tsc2, Sox2                                                                |

**Table S7. KEGG categories and respective enriched genes regulated by Ang II via AT1 receptor at 6 hours interval**

| <b>KEGG category</b>                    | <b>Up-regulated Genes</b>                                 |
|-----------------------------------------|-----------------------------------------------------------|
| RNA transport                           | Eif4e, Ube2i, Pop4, Nup35, Gemin6, Pigz, Gemin2           |
| Cell cycle                              | Chek1, Ccne1, Cdc45, Mad2l1, Gadd45b                      |
| Peroxisome                              | Pxmp4, Pex19, Eci2, Pex11b                                |
| Pyrimidine metabolism                   | Uck1, Cmpk2, Polr3k, Polr3gl                              |
| p53 signaling pathway                   | Chek1, Ccne1, Gadd45b                                     |
| Proteasome                              | Psmb9, Psbm4, Psmb1                                       |
| Riboflavin metabolism                   | Acp5, Acp6                                                |
| Homologous recombination                | Rad54b, Rpa2                                              |
| RNA polymerase                          | Polr3k, Polr3gl                                           |
| <b>KEGG category</b>                    | <b>Down-regulated Genes</b>                               |
| Focal adhesion                          | Bcar1, Ptk2, Itgb4, Pak1, Myl9, Flnb, Itgb6, Actn4, Vegfa |
| Regulation of actin cytoskeleton        | Bcar1, Ptk2, Itgb4, Pak1, Myl9, Itgb6, Iqgap1, Actn4      |
| Chemokine signaling pathway             | Plcb1, Stat3, Bcar1, Ptk2, Pak1, Gngt2                    |
| Lysosome                                | Ctsh, Cdig2, Gga2, Ctsa, Abcb9                            |
| Axon guidance                           | Ptk2, Pak1, Sema3c, Sema3f, Slit2                         |
| PPAR signaling pathway                  | Acsl1, Scd4, LOC681458, Gk                                |
| Adherens junction                       | Smad2, Ssx2ip, Iqgap1, Actn4                              |
| Aminoacyl-tRNA biosynthesis             | Aars, Farsb, Wars                                         |
| Biosynthesis of unsaturated fatty acids | Scd4, LOC681458                                           |
| Vitamin digestion and absorption        | Tcn2, Cubn                                                |

**Table S8. Biological processes (GO) and respective enriched genes regulated by Ang II via AT1 receptor at 6 hours interval**

| <b>Biological Process (GO)</b>                            | <b>Up-regulated Genes</b>                                                                                          |
|-----------------------------------------------------------|--------------------------------------------------------------------------------------------------------------------|
| protein ubiquitination                                    | Psmb9, Arrb2, Ube2i, Ube2t, Psmb4, Rnf168, Psmb1, Arrb2, Mad211, Birc5                                             |
| proteasomal ubiquitin-dependent protein catabolic process | Psmb9, Arrb2, Ube2i, Mad211, Jkamp, Psmb4, Psmb1                                                                   |
| mitotic cell cycle                                        | Eif4e, Psmb9, Mad211, Psmb4, Birc5, Psmb1                                                                          |
| DNA repair                                                | Chek1, Gen1, Alkbh2, Rpa2, Rnf168                                                                                  |
| regulation of cell growth                                 | Cd44, Exosc9, Ccdc85b, Ulk1, Zfp639                                                                                |
| cell division                                             | Ube2i, Ccne1, Cdc45, Spast, Birc5                                                                                  |
| cellular process involved in reproduction                 | Sep15, Arrb2, Nkx2-1, Syt6, Zfp639                                                                                 |
| cell cycle process                                        | Psmb9, Mad211, Psmb4, Birc5, Psmb1                                                                                 |
| response to peptide hormone stimulus                      | Prss8, Aqp2, Prlh, Birc5                                                                                           |
| <b>Biological Process (GO)</b>                            | <b>Down-regulated Genes</b>                                                                                        |
| signal transduction                                       | Chd4, Cdh13, Grin2c, Ngfr, Il1rl1, Itpr3, Xpr1, Aars, Srebf2, Arhgap28, Fert2, Scara5, Ngf, Iqgap1, Vapb, Arhgap10 |
| cell differentiation                                      | Egr2, Klf4, Sox9, Ngfr, Plcb1, Ptk2, Jag1, Clip3, Cd276, Slit2, Zmiz1, Sohlh1, Srf, Ascl1, Dhh                     |
| response to organic substance                             | Abcc4, Cdh13, Stat3, Acsl1, Fosl1, Ptk2, Sdc2, Smad2, Pak1, Srebf2, Ngf, Slit2, Pea15a, Hspd1, GK                  |
| regulation of cell proliferation                          | Nrg1, Sox9, Abcc4, Cdh13, Ngfr, Irs1, Ptk2, Ngf, Zmiz1, Sox4, Apln, Nolc1, Vegfa, Nr2f2, Klf4, Jag1                |
| negative regulation of apoptosis                          | Nrg1, Sox9, Cdh13, Ngfr, Dnajb9, Ptk2, Lrp1, Ngf, Pea15a, Sox4, Hspd1, Ascl1, Vegfa                                |
| response to stress                                        | Adh5, Ubqln1, Dnajb9, Sdc2, Aars, Pak1, Scara5, Sox4, Vapb, Actn4, Hspd1, Gk, Vegfa                                |
| regulation of signal transduction                         | Klf4, Avpi1, Cdh13, Ngfr, Irs1, Jag1, Smad2, Pak1, Ngf, Sulf2, Slit2, Ascl1, Vegfa                                 |
| cell surface receptor linked signaling pathway            | Plcb1, Spn, Stat3, Acsl1, Bcar1, Gfra1, Il1rap, Il1rl1, Itgb4, Fcgr2b, Itgb6, Slit2                                |
| cell adhesion                                             | Nrg1, Cdh13, Bcar1, Ptk2, Itgb4, Fert2, Pcdh9, Ssx2ip, Itgb6, Omd                                                  |

**Table S9. KEGG categories and respective enriched genes regulated by Ang II via AT2 receptor at 3 hours interval**

| <b>KEGG category</b>                                | <b>Up-regulated Genes</b> |
|-----------------------------------------------------|---------------------------|
| <b>Purine metabolism</b>                            | Gucy1b2, Pfas, Polr2i     |
| <b>Steroid hormone biosynthesis</b>                 | Ugt1a6, Cyp1b1            |
| <b>Retinol metabolism</b>                           | Ugt1a6, Dhhs3             |
| <b>Metabolism of xenobiotics by cytochrome P450</b> | Ugt1a6, Cyp1b1            |
| <b>Drug metabolism - other enzymes</b>              | Ugt1a6, Ces2a             |
| <b>N-Glycan biosynthesis</b>                        | Ganab, Man1c1             |

  

| <b>KEGG category</b>                    | <b>Down-regulated Genes</b>                                     |
|-----------------------------------------|-----------------------------------------------------------------|
| <b>Pathways in cancer</b>               | Pik3ca, Itgb1, Myc, Prkca, Fgf9, Axin2, Hdac1, Cbl, Birc5, Sos2 |
| <b>MAPK signaling pathway</b>           | Dusp6, Myc, Prkca, Fgf9, Rasa1, Pak2, Ppp3r1, Rras, Sos2        |
| <b>Regulation of actin cytoskeleton</b> | Ppp1r12a, Pik3ca, Itgb1, Fgf9, Pak2, Itga4, Rras, Sos2          |
| <b>ErbB signaling pathway</b>           | Pik3ca, Myc, Prkca, Hbegf, Areg, Pak2, Cbl, Sos2                |
| <b>Focal adhesion</b>                   | Ppp1r12a, Pik3ca, Itgb1, Prkca, Pak2, Itga4, Sos2               |
| <b>Axon guidance</b>                    | Itgb1, Rasa1, Pak2, Ppp3r1                                      |
| <b>VEGF signaling pathway</b>           | Pik3ca, Prkca, Ppp3r1                                           |

**Table S10. Biological processes (GO) and respective enriched genes regulated by Ang II via AT2 receptor at 3 hours interval**

| <b>Biological process (GO)</b>                                            | <b>Up-regulated Genes</b>                                                                 |
|---------------------------------------------------------------------------|-------------------------------------------------------------------------------------------|
| cell differentiation                                                      | Igfbp3, Gpsm1, Ggn, Sox18, Lrp6, Nr0b1, Mdk                                               |
| angiogenesis                                                              | Ecm1, Cyp1b1, Ccl24, Sox18, Pnpla6                                                        |
| response to peptide hormone stimulus                                      | Ugt1a6, Pnmt, Lrp6, Nr0b1                                                                 |
| embryo development                                                        | Foxn3, Ccno, Foxj2, Fzd2                                                                  |
| regulation of sequence-specific DNA binding transcription factor activity | Lrp6, Foxn3, Foxj2, Nr0b1                                                                 |
| vasculature development                                                   | Cypb1, Sox18, Fzd2                                                                        |
| canonical Wnt receptor signaling pathway                                  | Lrp6, Fzd2, Bambi                                                                         |
| <b>Biological process (GO)</b>                                            | <b>Down-regulated Genes</b>                                                               |
| cell differentiation                                                      | Dusp6, Bzw2, Fgf9, Snai2, Rasa1, Axin2, Areg, Ppp3r1, Rora, Runx2, Sh2b3, Fhl2, Ctgf, Dhh |
| negative regulation of apoptosis                                          | Pik3ca, Myc, Serbp1, Rasa1, Zc3hc1, Hdac1, Api5, Pea15a, Cbl, Birc5, Pim3                 |
| positive regulation of cell proliferation                                 | Itgb1, Myc, Prkca, Hbegf, Fgf9, Areg, Hdac1, Etv5, Aggf1, Runx2, Ctgf                     |
| ossification                                                              | Mmp13, Fgf9, Snai2, Axin2, Areg, Impad1, Nab2, Runx2, Fhl2, Ctgf                          |
| negative regulation of cell proliferation                                 | Gtpbp4, Itgb1, Prkca, Emd, Eif2ak1, Axin2, Hdac1, Eif2ak2                                 |
| cell adhesion                                                             | Cdh17, Itgb1, Rasa1, Tnfrsf12a, Aggf1, Itga4, Ctgf, Cdhr1                                 |
| canonical Wnt receptor signaling pathway                                  | Emd, Fgf9, Snai2, Axin2, Hdac1, Lats2, Cyld                                               |
| regulation of signal transduction                                         | Dusp6, Zfp91, Prkca, Fgf9, Slc7a1, Hdac1, Runx2                                           |
| regulation of cell proliferation                                          | Myc, Prkca, Hbegf, Emd, Fgf9, Etv5, Eif2ak2                                               |
| aging                                                                     | Lonp1, Prkca, Eno3, Canx, Ctgf, Tfrc                                                      |
| dephosphorylation                                                         | Dusp6, Ppp1r12a, Acp2, Ppp3r1, Impad1, Pdp1                                               |
| regulation of mitotic cell cycle                                          | Myc, Cyld, Brd4, Birc5, Pim3, LOC690728                                                   |

**Table S11. KEGG categories and respective enriched genes regulated by Ang II via AT2 receptor at 6 hours interval**

| <b>KEGG category</b>                      | <b>Up-regulated Genes</b>                                                                                          |
|-------------------------------------------|--------------------------------------------------------------------------------------------------------------------|
| Peroxisome                                | Phyx, Pex19, Paox, Crot, Mlycd                                                                                     |
| mTOR signaling pathway                    | Cab39l, Eif4b, Ulk1, Rps6kb2, Pgf                                                                                  |
| Cytosolic DNA-sensing pathway             | Nfkbia, Mavs, Ikbke, Polr2e                                                                                        |
| Sphingolipid metabolism                   | Sphk1, Galc, Ppap2a                                                                                                |
| SNARE interactions in vesicular transport | Vamp1, Vamp4, Stx8                                                                                                 |
| <b>KEGG category</b>                      | <b>Down-regulated Genes</b>                                                                                        |
| MAPK signaling pathway                    | Dusp6, Bdnf, Hspa8, Ppp3ca, Prkca, Gadd45a, Mapkapk2, Pak1, Mecom, Dusp16, Rapgef2, Ngf, Rps6ka5, Rras2, Max, Stk3 |
| Pathways in cancer                        | Cdk6, Pik3ca, Prkca, Stat5b, Arnt, Igf1r, E2f3, Skp2, Mecom, Pias1, Traf3, Rad51, Max, Bid, Ccdc6                  |
| Focal adhesion                            | Pik3ca, Prkca, Bcar1, Igf1r, Capn2, Mylk3, Pak1, Myl9, Vcl, Dock1, Myl12b, Ccnd2                                   |
| Regulation of actin cytoskeleton          | Pik3ca, Bcar1, Myh9, Mylk3, Pak1, Myl9, Vcl, Dock1, Rras2, Myl12b, Nckap, Msn                                      |
| Cell cycle                                | Cdk6, Cdc25a, Gadd45a, E2f3, Skp2, Ccna, Mcm4, Cdc6, Anapc10, Ccnd2, Mad11l                                        |
| Neurotrophin signaling pathway            | Pdk1, Pik3ca, Bdnf, Camk2d, Irs1, Mapkapk2, Ngf, Rps6ka5, Sh2b3                                                    |
| RNA transport                             | Eif4ebp1, Eif4e, Eif4a1, Nup93, Eif3a, Tmem48, Eif5, Pigz, Nup98                                                   |
| ErbB signaling pathway                    | Eif4ebp1, Pik3ca, Camk2d, Prkca, Stat5b, Hbegf, Pak1                                                               |
| p53 signaling pathway                     | Cdk6, Serpine1, Gadd45a, Ei24, Ccnd2, Bid                                                                          |
| Glioma                                    | Cdk6, Pik3ca, Camk2d, Prkca, Igf1r, E2f3                                                                           |
| Apoptosis                                 | Cflar, Pik3ca, Ppp3ca, Capn2, Ngf, Bid                                                                             |
| Progesterone-mediated oocyte maturation   | Pik3ca, Cdc25a, Igf1r, Ccna1, Anapc10, Mad11l                                                                      |
| Ribosome biogenesis in eukaryotes         | Cirh1a, Mphosph10, Utp15, Heatr1, Xrn2, Gar1                                                                       |
| mTOR signaling pathway                    | Eif4ebp1, Eif4e, Pik3ca, Prkaa1                                                                                    |
| Circadian rhythm - mammal                 | Npas2, Csnk1e, Csnk1d, Bhlhe40                                                                                     |
| Steroid biosynthesis                      | Hsd17b7, Nsdhl, Soat1                                                                                              |

**Table S12. Biological processes (GO) and respective enriched genes regulated by Ang II via AT2 receptor at 6 hours interval**

| Biological Process (GO)                        | Up-regulated Genes                                                                                                                                                                                     |
|------------------------------------------------|--------------------------------------------------------------------------------------------------------------------------------------------------------------------------------------------------------|
| positive regulation of cell proliferation      | Sphk1, Il11, Casr, Erbb2, Stat5a, Ccnb1, Rogdi, Cd47, Myd88, Tbx18, Sox4, Cyba                                                                                                                         |
| protein transport                              | Dnajc14, Exoc3, Dnm2, Mcoln1, Nutf2, Tmed3, Duoxa1, Chmp1a, Gorasp1, Psen2, Sec16b                                                                                                                     |
| brain development                              | Stxbp3, Sphk1, Dmbx1, Tmem57, Bbc3, Fzd1, Tulp3, Cdk5rap3, Sharpin, Synj2                                                                                                                              |
| regulation of cell proliferation               | Sphk1, Ndr2, Erbb2, Mitf, Nfkbia, Ifi30, Creb3, Myd88, Cyba                                                                                                                                            |
| vesicle-mediated transport                     | Stxbp3, Vamp1, Sar1a, Vamp4, Chmp1a, Stx8, Sec16b                                                                                                                                                      |
| inflammatory response                          | Sphk1, Lipa, Cyp4f5, Map2k3, Lias, Cyba                                                                                                                                                                |
| cell surface receptor linked signaling pathway | Erbb2, Fcer1g, Cd47, Myd88, Itga10, Plxnb1                                                                                                                                                             |
| I-kappaB kinase/ NF-kappaB cascade             | Nfkbia, Ltbr, Myd88, Mavs, Ikbke, Sharpin                                                                                                                                                              |
| chromatin modification                         | Apbb1, Suv420h2, Smarcal1, Smarcd2                                                                                                                                                                     |
| innate immune response                         | Myd88, Sp110, Mavs, Cyba                                                                                                                                                                               |
| response to stress / oxygen levels             | Ccnb1, Ndr1, Bbc3, Asl                                                                                                                                                                                 |
| Biological Process (GO)                        | Down-regulated Genes                                                                                                                                                                                   |
| protein phosphorylation                        | Nek2, Cdk6, Pdk1, Pik3ca, Cdk12, Prkca, Igf1r, Mapkp2, Mylk3, Pak1, Lmtk2, Lats2, Mast4, Pdik1l, Rps6ka5, MSt4, Nek7, Vrk2, Riok3, Mdfic, Epha2, Bmx, Gsk3a, Csnk1e, Csnk1d, Stk3, Prkaa1, Hipk2, Plk2 |
| signal transduction                            | Stat5b, Il1rl1, Ahr, Rtkn, Ngf, Asap1, Traf3, Siva1, Syde1, Rras2, Stard13, Gsk3a, Pdpn, Ramp2, Arhgap17, Stk3, Arhgap10, Akap12, Gnb5, Plk2, Hmga2, Bpm7                                              |
| apoptosis                                      | Slah2, Hip1, Ahr, Nlrp3, Rtkn, Ngf, Fam82a, Nlrp1a, Bag4, Aen, Siva1, Pea15a, Epha2, Dap, Bid, Stk3                                                                                                    |
| protein transport                              | Stxb1, Myh9, Abra, Nup93, Lmtk2, Ipo9, RUFy1, Tmem48, Rab6b, Pex14, Timm10, Vps45, Arf2, Nup98, Sec31a                                                                                                 |
| negative regulation of apoptosis               | Cflar, Pik3ca, Bdnf, Stat5b, Igf1r, Skp2, Btg2, Rtkn, Ngf, Nduf4f, Siva1, Pea15a, Hipk3, Rtn4, Cat, Serpine1, Accn1, Cd44, Nes, Figl1, Btg2, Ung, Tfp4, Wfs1, Bmp7                                     |
| response to organic cyclic compound            | Dusp6, Bdnf, Eno2, Prkca, Cd44, Ahr, Homer1, Btg2, Ngf, Atf1, Ctgf, Ccdnd2                                                                                                                             |
| regulation of cell proliferation               | Cdk6, Serpine1, Prkca, Stat5b, Hbgef, Plcd3, Skp2, Mecom, Atp2b1, Mfn2, Bid, Rbpj                                                                                                                      |
| cell cycle                                     | Cdk6, Siah2, Cdc25a, Ppp6c, Ahr, Spc25, Ccdc99, Thap1, Specc1l, Pdpn, Rgs2                                                                                                                             |

|                                      |                                                                             |
|--------------------------------------|-----------------------------------------------------------------------------|
| <b>response to estrogen stimulus</b> | Eno2, Serpine1, Prkca, Stat5b, Ahr, Rbbp5, Ramp2, Ctgf,<br>Ccnd2, Bid, Bmp7 |
| <b>DNA replication</b>               | Rfc2, Cdc25a, Kctd13, Mcm4, Clspn, Pole, Blm, Cdc6, Ctgf,<br>Nup98          |
| <b>regulation of apoptosis</b>       | Cflar, Hip1, Mllt11, Deptor, Mst4, Traf3, Pea15a, Bid, Wfs1                 |
| <b>nervous system development</b>    | Bdnf, Hbgef, Nes, Kat2a, Fnbp1l, Epha2, Slc7a5, Pdpn,<br>Bhlhe40, Rtn4      |
| <b>response to stress</b>            | Bdnf, Cat, Hspa8, Serpine1, ppp3ca, Ahr, Homer1,<br>Rps6ka5, Pdpn, Ctgf     |
| <b>cell division</b>                 | Cdc5a, Ccna1, Spc25, Ccdc99, Top2a, Cdc6, Specc1l,<br>Ccnd2                 |

---



---
